# Supplementary material
Source: Springer Nature journal article supplement (https://www.springermedizin.de/resource/supplementary/13613_2011_1_MOESM2_ESM.pdf/15427238)

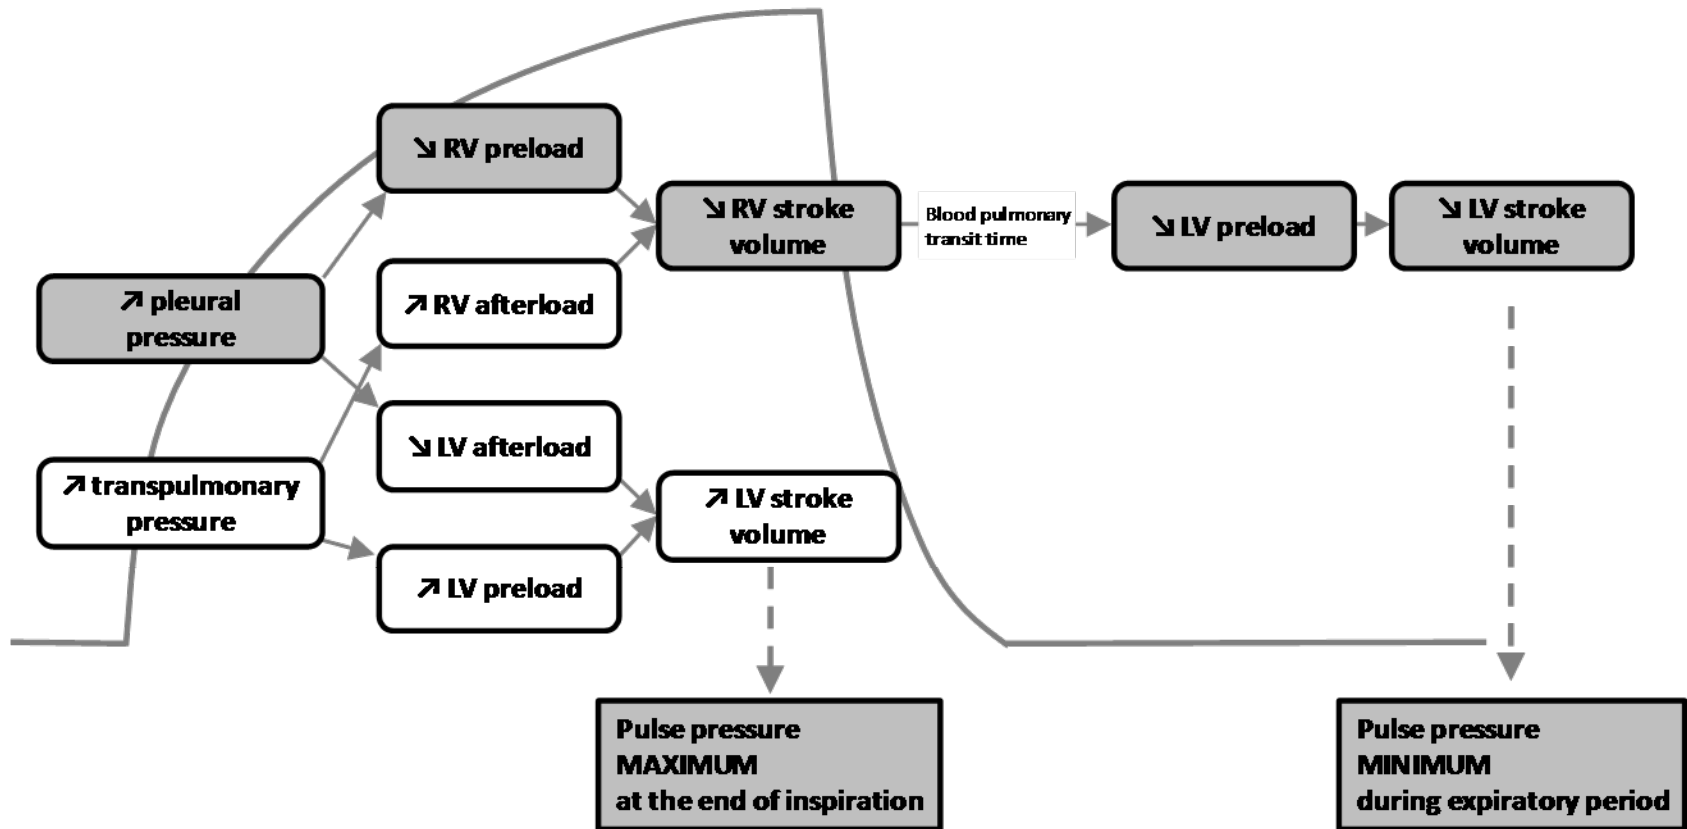

Supplement: MOESM2 [file 15427238]
